# Supplementary material for: How to communicate the scientific consensus on climate change: plain facts, pie charts or metaphors?
Source: Springer Nature journal article supplement (doi:10.1007/s10584-014-1190-4), 2014-07-04
Supplement: MOESM1 [file 10584_2014_1190_MOESM1_ESM.doc]

**Supplementary Material**

**Supplement A:**

**Sample characteristics and key (pre-test) climate change belief measures**

|  | **Total sample (*n* = 1,104)** |
| --- | --- |
| Demographic Characteristics |  |
| Gender (female %) | 52 |
| Age (modal bracket) | 35-44 (18, 75+) |
| Education (bachelor’s degree or higher %) | 36 |
| Party Affiliation (% Democrat) | 38 |

**Key beliefs about climate change (0 – 100) Item Mean (S.E.)**

Estimate of Scientific Consensus 66.98 (0.68)

Certainty of Estimate 60.20 (0.88)

Belief in Climate Change 73.08 (0.85)

Human Causation 63.98 (0.77) Worry about Climate Change 62.84 (0.90)

Desire for Action 75.19 (0.73)

**Supplement B**

**Measurement of Survey Items**

**Estimate of the scientific consensus**

Subjects were asked **the following question: “To the best of your knowledge, what percentage of climate scientists have concluded that human-caused climate change is happening?” Response options were given on a continuum, ranging from 0% of climate scientists think that human-caused climate change is happening to 100%.**

**Belief certainty of estimate**

Directly following estimates of the scientific consensus, subjects were asked how certain they are about their answer. Response options were given on a continuum, ranging from 0 (I am not at all certain), 50 (neutral) to 100 (I am very certain).

**Manipulation check**

Subjects were asked the following question**;** “**According to the statement we showed you about climate scientists, what % of climate scientists have concluded that human-caused climate change is happening?” Response options were given on a continuum, ranging from 0% to 100%.**

**Belief in Climate Change**

Subjects were asked the following question; “How strongly do you believe that climate change is or is not happening?” Response options were given on a continuum, ranging from 0 (I strongly believe that climate change is not happening), 50 (I am unsure whether or not climate change is happening) to 100 (I strongly believe climate change IS happening).

**Belief in human causation**

Subjects were asked the following question; “**Assuming climate change IS happening: How much of it do you believe is caused by human activities, natural changes in the environment, or some combination of both?”** Response options were given on a continuum, ranging from 0 (I believe that climate change is caused entirely by natural changes in the environment), 50 (I believe that climate change is caused equally by natural changes and human activities) to 100 (I believe that climate change is caused entirely by human activities).

**Worry about Climate Change**

Subjects were asked the following question; **“On a scale from 0 to 100, how worried are you about climate change?”** Response options were given on a continuum, ranging from 0 (I am not at all worried), 50 (neutral) to 100 (I am very worried).

**Required Action**

Subjects were asked the following question; “**Do you think people should be doing more or less to reduce climate change?”** Response options were given on a continuum, ranging from 0 (Much less), 50 (Same amount) to 100 (Much more).

**Supplement C**

**Experimental Treatment Examples**


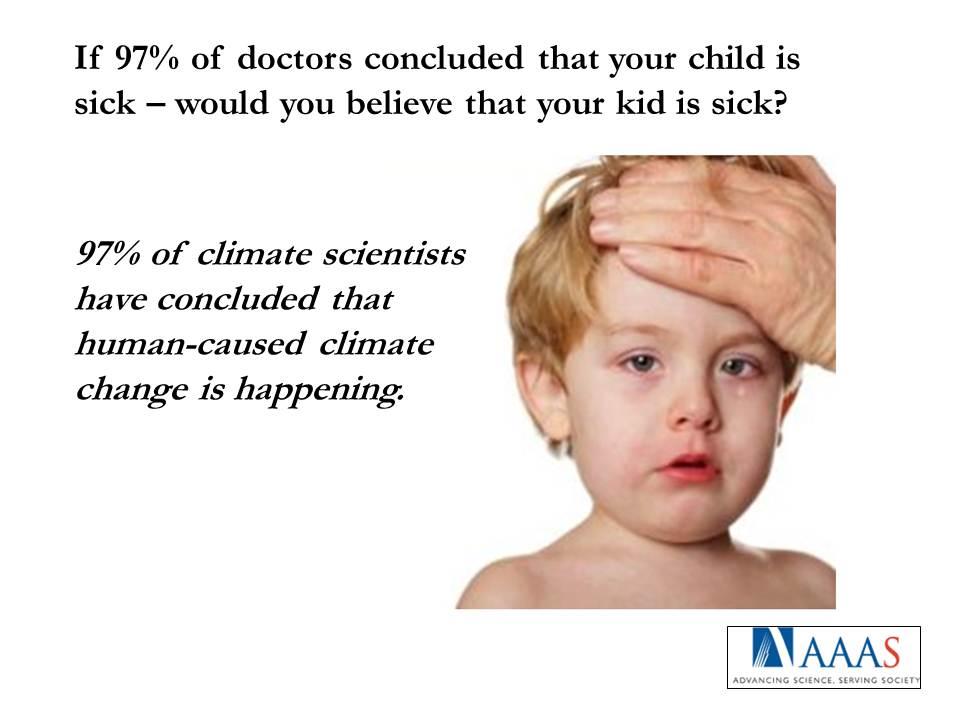


**Example Treatment 1: Full Doctor Metaphor (Belief)**


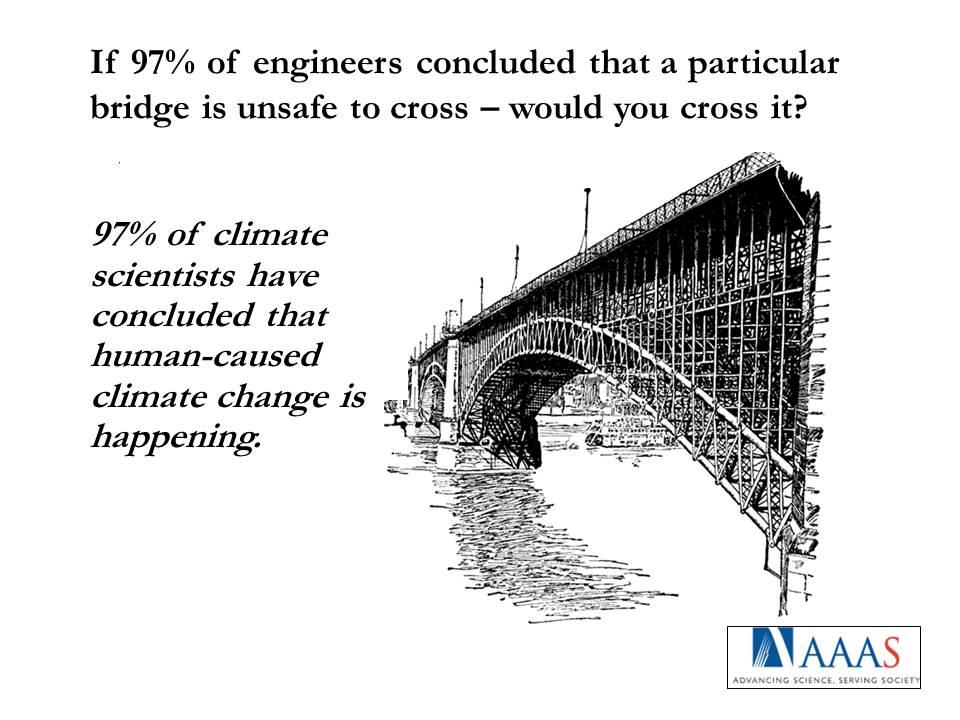


**Example Treatment 2: Full Bridge Metaphor (Action**)


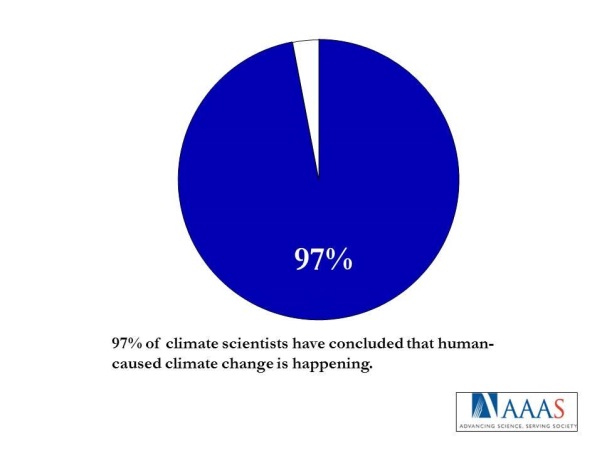


**Example Treatment 3: Pie Chart**


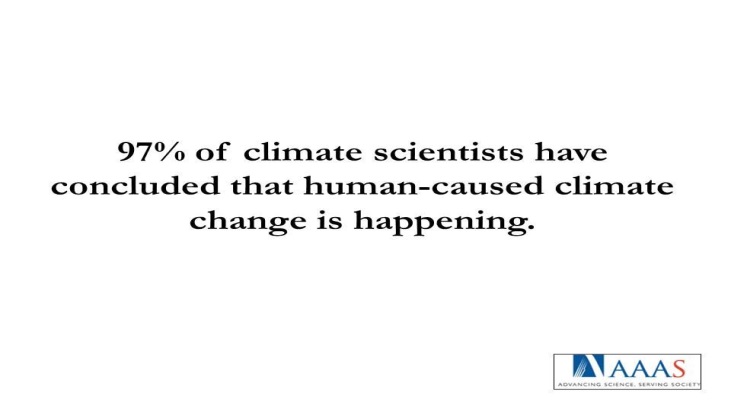


**Example Treatment 4: Descriptive Scientific Text**
